# Supplementary material for: Going “Green” in the Prevention and Management of Atherothrombotic Diseases: The Role of Dietary Polyphenols
Source: MDPI journal article supplement (doi:10.3390/jcm10071490), 2021-04-03

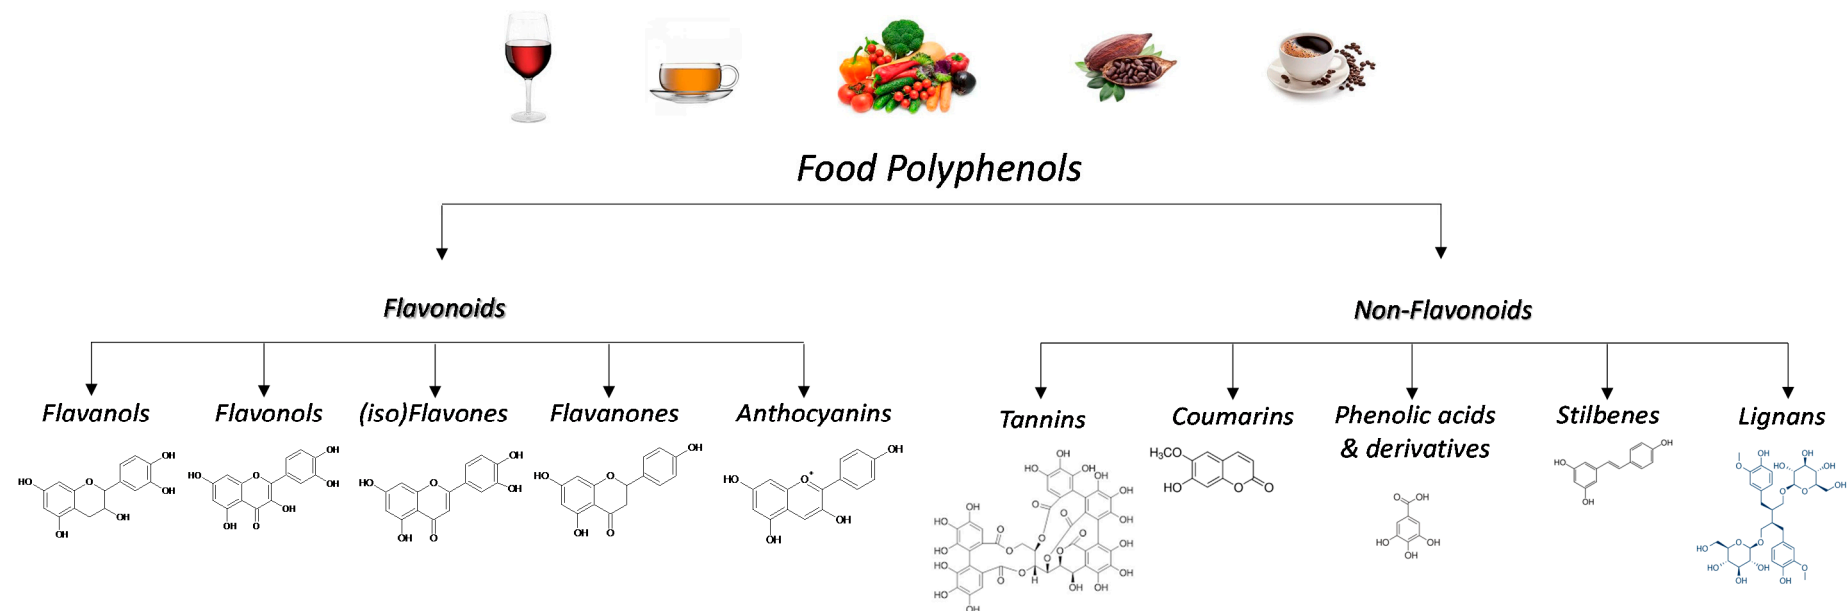

Supplement: s1 [file s1]
